# Supplementary material
Source: publisher site journal article supplement (https://www.spandidos-publications.com/5673/downloadSupplementary)

Figure S1. ROC curves of IALBI in the validation cohort. ROC curve at (A) 1, (B) 3 and (C) 12 months. ROC, receiver operating characteristic; IALBI, INR-albumin-bilirubin; AUC, area under ROC curve; NPV, negative predictive value.

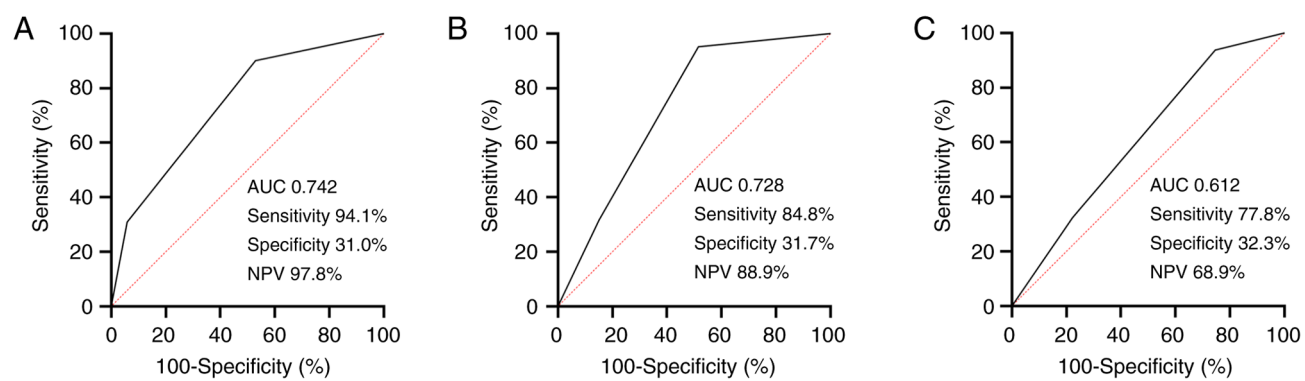

Supplement: Supplementary file 1 [file downloadSupplementary]
